# Supplementary material for: Polymorphism in cocrystals of urea:4,4′-bipyridine and salicylic acid:4,4′-bipyridine
Source: Royal Society of Chemistry journal article supplement (doi:10.1039/c4ce00866a), 2014-01-01
Supplement: c4ce00866a1.pdf [file c4ce00866a1.pdf]

# **Polymorphism in cocrystals of urea : 4,4'-bipyridine and salicylic acid : 4,4'- bipyridine**

Srinu Tothadi

Solid State and Structural Chemistry Unit, Indian Institute of Science, Bangalore 560 012, India.

## **Supporting Information**

### **Content**

|   |                                                                                                      |         |
|---|------------------------------------------------------------------------------------------------------|---------|
| 1 | ORTEP diagrams<br>(All atoms in molecular structure showing 50% probability displacement ellipsoids) | Page S2 |
| 2 | Packing polymorphs of Form IB and form IIB                                                           | Page S4 |
| 3 | Cocrystal polymorphs with 4,4-bipyridine                                                             | Page S5 |

1. ORTEP diagrams (All atoms in molecular structure showing 50% probability displacement ellipsoids)

1. Urea : 4,4'-bipyridine polymorphic cocrystals Form IA (1)

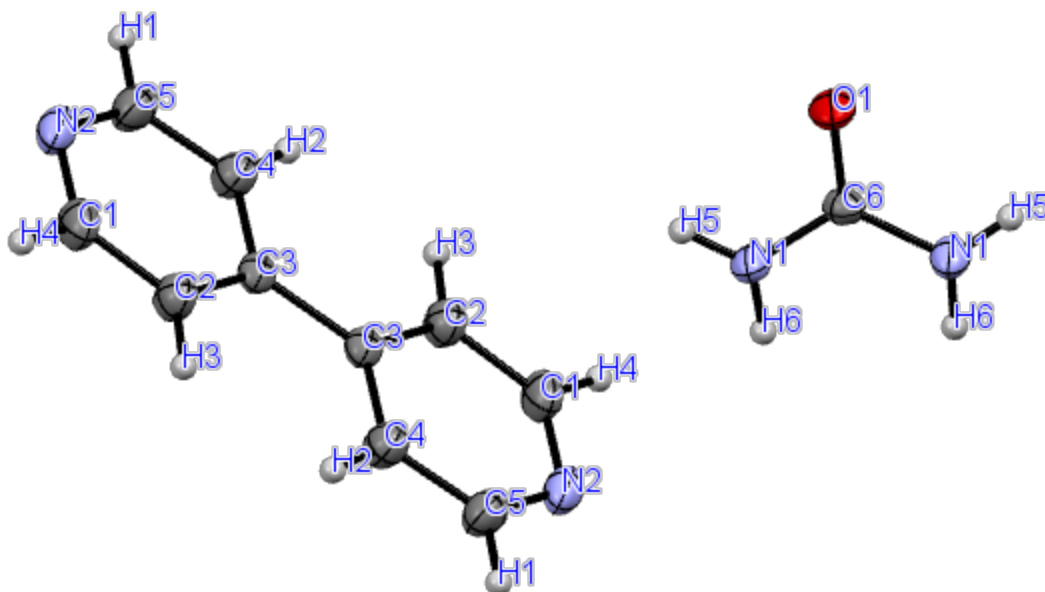

2. Urea : 4,4'-bipyridine polymorphic cocrystals Form II A (2)

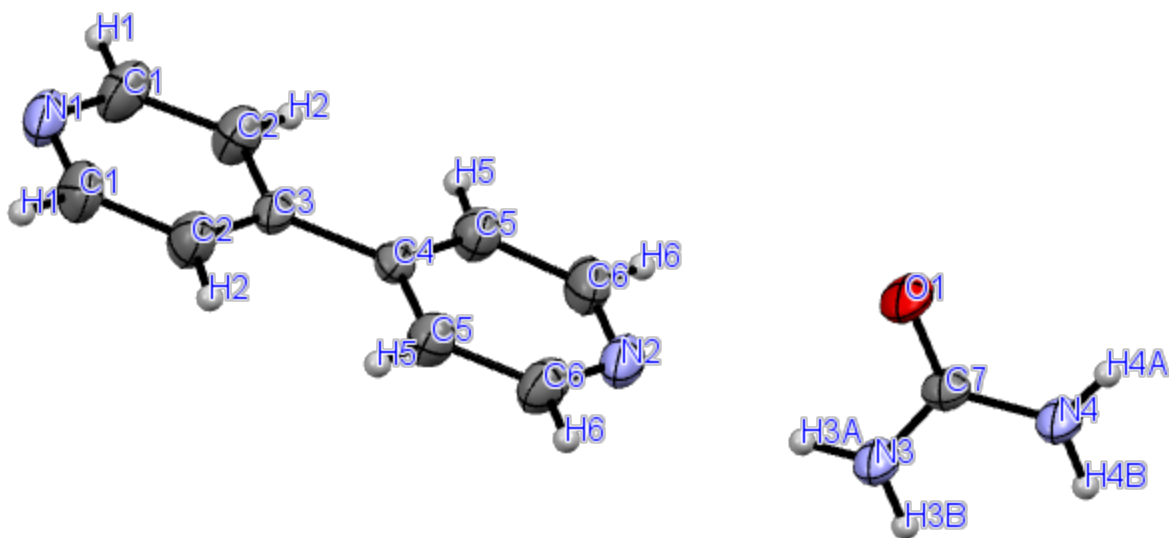

3. Salicylic acid and 4,4'-bipyridine cocrystal Form I B (3)

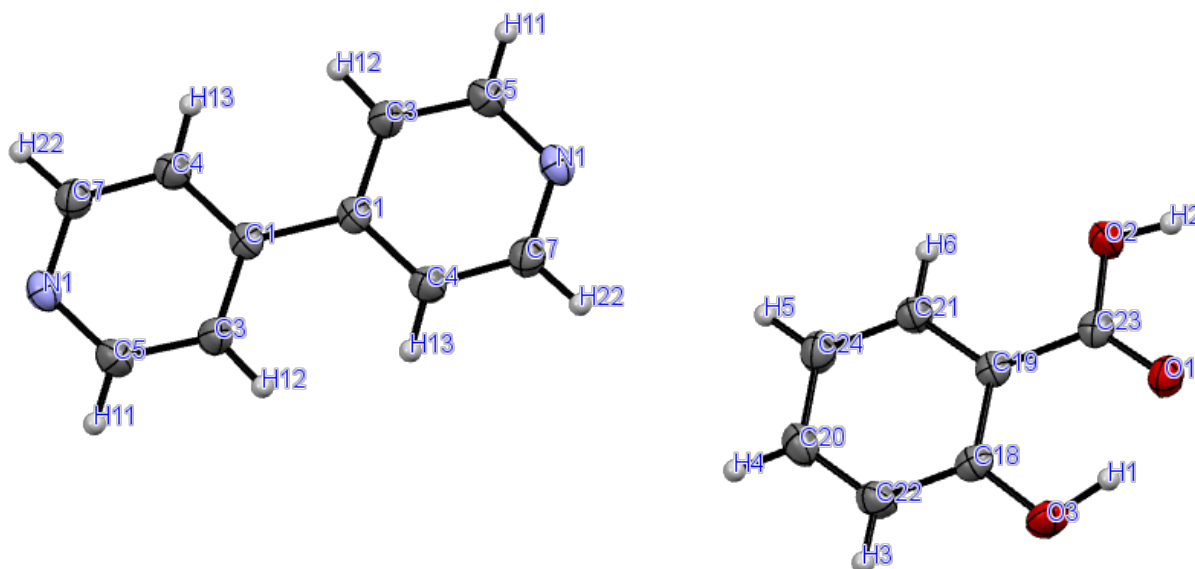

4. Salicylic acid : 4,4'-bipyridine cocrystal Form II B (4)

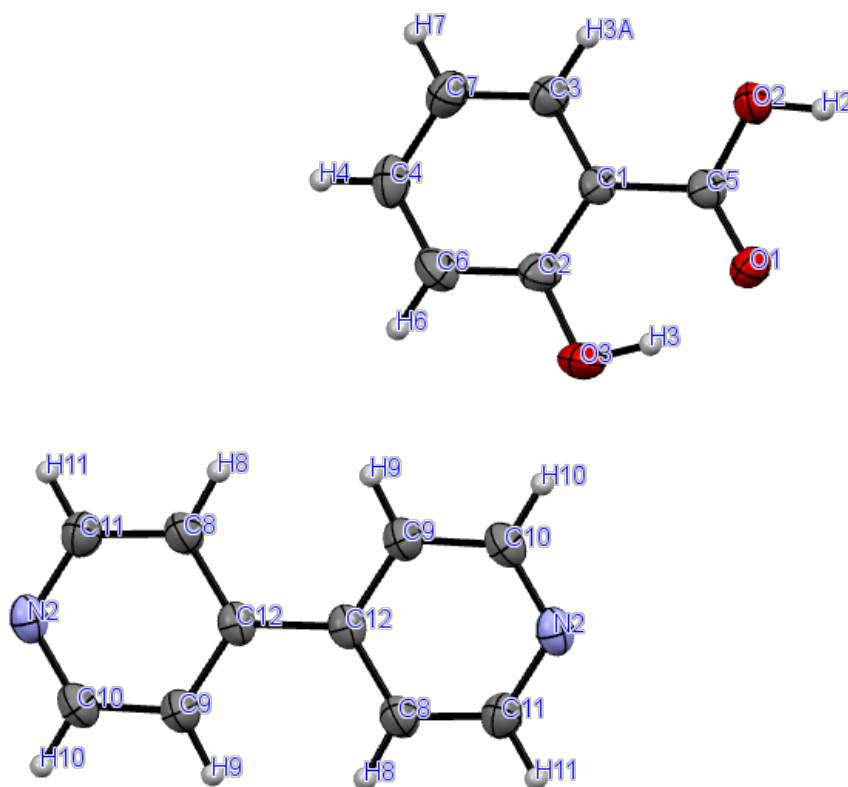

## 2. Packing polymorphs of Form IB and form IIB

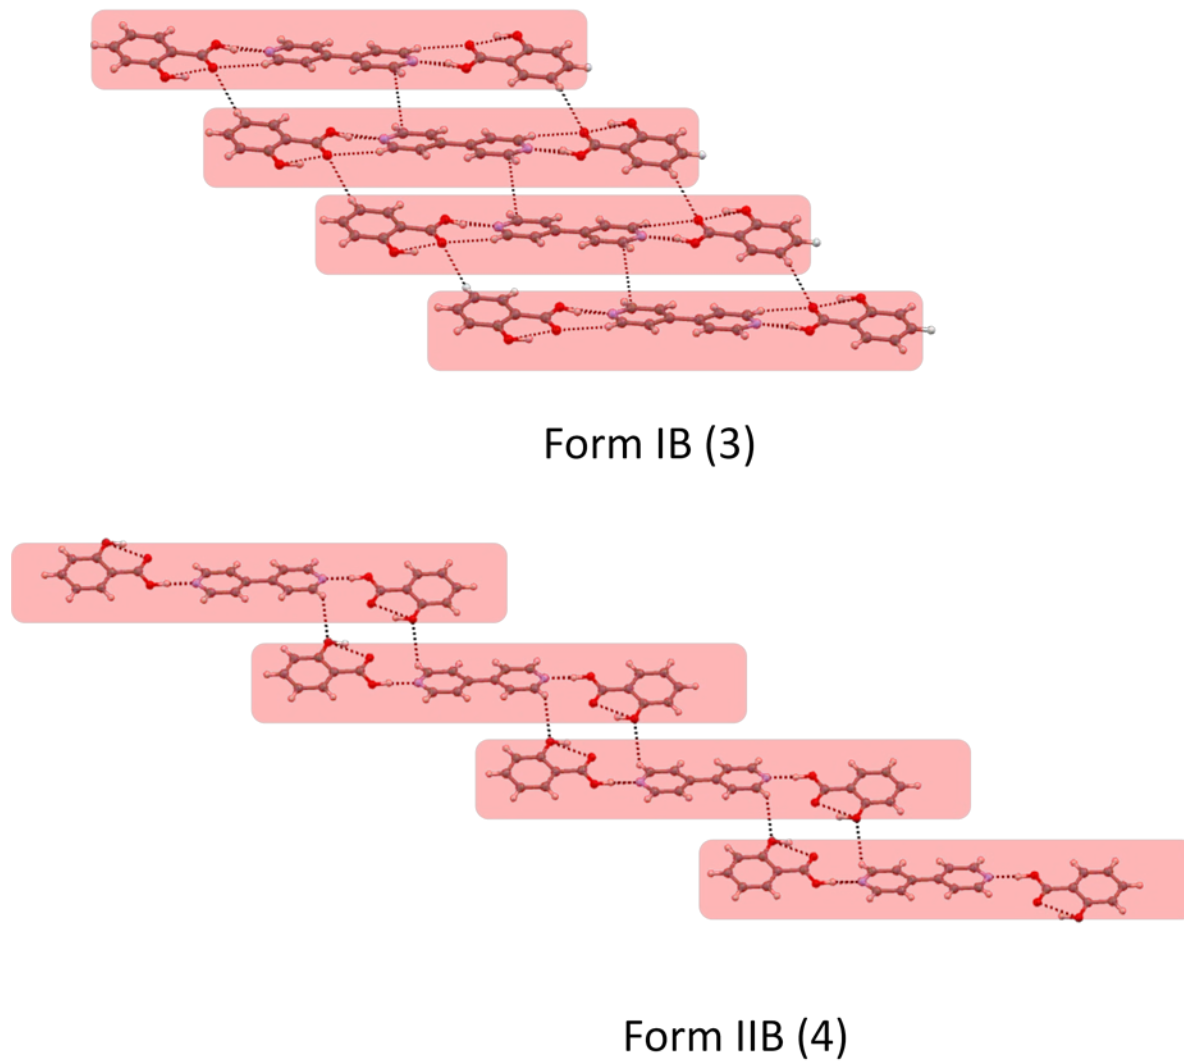

**Figure S1.** Trimers are obtained with two of salicylic acid and one of 4,4'-bipyridine. Notice Form IIB slides more compare form IB.

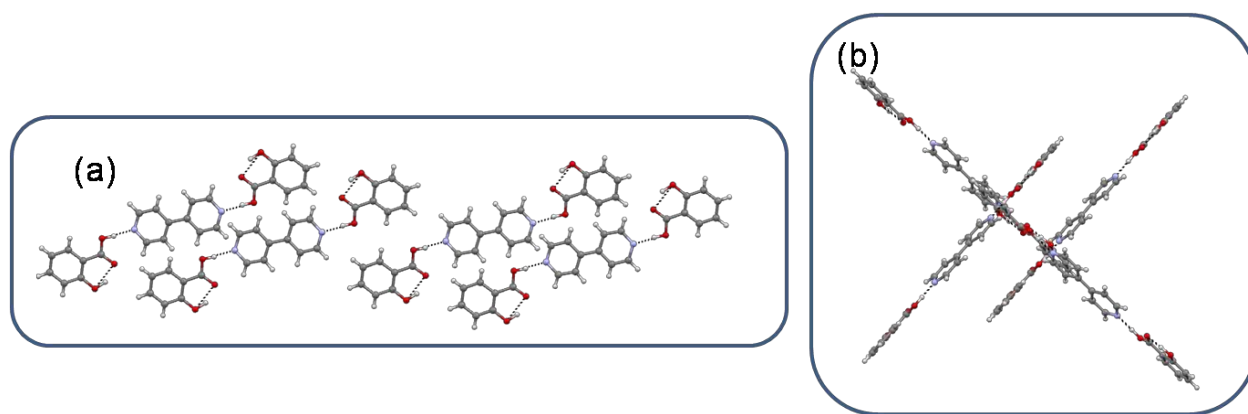

**Figure S2.** Trimers (a) Parallel in Form IB (b) perpendicular in Form IIB along the c-axis

**Table S1.** Cocrystal polymorphs with 4,4'-bipyridine

| <b>Cocrystal Dimorphs</b> | <b>Cocrystal Trimorphs</b> | <b>Cocrystal quartermorphs</b> |
|---------------------------|----------------------------|--------------------------------|
| EPUPUB                    | MACCID                     | UBUJIM                         |
| EPUPUB01                  | MACCID01                   | UBUJIM01                       |
| ELEGUY                    | MACCID02                   | UBUJIM02                       |
| ELEGUY01                  | XOLHUC                     | UBUJIM03                       |
|                           | XOLHUC01                   | UBUJIM04                       |
|                           | XOLHUC02                   |                                |

Polymorphic cocrystal structures with 4,4'-bipyridine are obtained when CSD analysis was carried out with some constrains (must have 4,4'-bipyridine and minimum two different chemical components in the unit cell. 3D coordinates determined, no errors, no ions and only organic structures). Considering Refcodes and cell parameters, manually separated above listed polymorphs from a total of 299 structures.
